# Supplementary material for: (R)-8-Methylsulfinyloctyl isothiocyanate from Nasturtium officinale inhibits LPS-induced immunoinflammatory responses in mouse peritoneal macrophages: chemical synthesis and molecular signaling pathways involved
Source: Royal Society of Chemistry journal article supplement (doi:10.1039/d3fo02009f), 2023-01-01
Supplement: d3fo02009f1.pdf [file d3fo02009f1.pdf]

## Supporting Information

### **(R)-8-methylsulfinyloctyl isothiocyanate from *Nasturtium officinale* inhibits LPS-induced immunoinflammatory response in mouse peritoneal macrophages: chemical synthesis and molecular signaling pathways involved**

Manuel Alcarranza<sup>a,b</sup>, Isabel Villegas<sup>a,b</sup>, Rocío Recio<sup>c</sup>, Rocío Muñoz-García<sup>a,b</sup>, Inmaculada Fernández<sup>c</sup> and Catalina Alarcón-de-la-Lastra<sup>a,b\*</sup>

<sup>a</sup>Department of Pharmacology, Faculty of Pharmacy, Universidad de Sevilla, 41012 Sevilla, Spain.  
[malcarranza@us.es](mailto:malcarranza@us.es) ; [villegas@us.es](mailto:villegas@us.es) ; [rmgarcia@us.es](mailto:rmgarcia@us.es); [calarcon@us.es](mailto:calarcon@us.es)

<sup>b</sup>Instituto de Biomedicina de Sevilla, IBiS (Universidad de Sevilla, HUVR, Junta de Andalucía, CSIC), Seville, Spain.

<sup>c</sup>Departamento de Química Orgánica y Farmacéutica, Facultad de Farmacia, Universidad de Sevilla, 41012 Sevilla, Spain. [rrecioj@us.es](mailto:rrecioj@us.es) ; [inmaff@us.es](mailto:inmaff@us.es)

\*Correspondence: [calarcon@us.es](mailto:calarcon@us.es); Tel: +34 954559877

### <sup>1</sup>H-NMR, <sup>13</sup>C-NMR of selected compounds

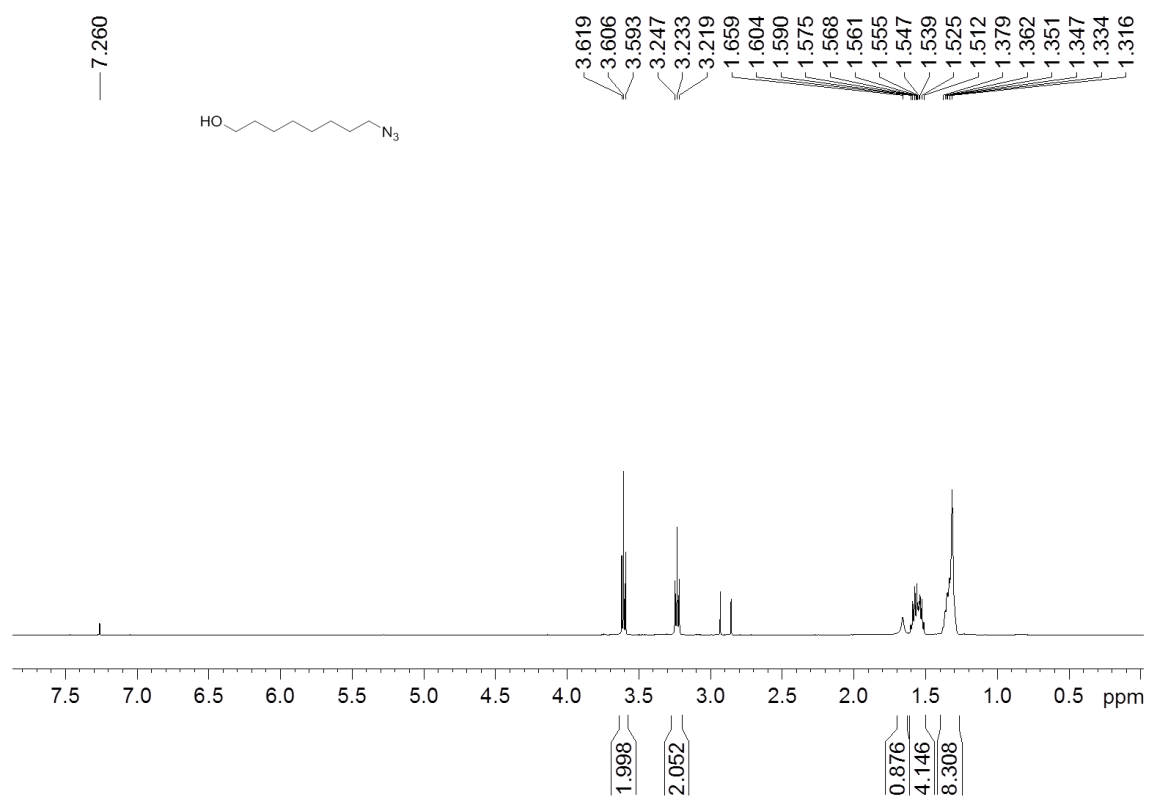

Figure S1. <sup>1</sup>H-NMR (500 MHz, CDCl<sub>3</sub>) of 8-Azidoctan-1-ol (**2**)

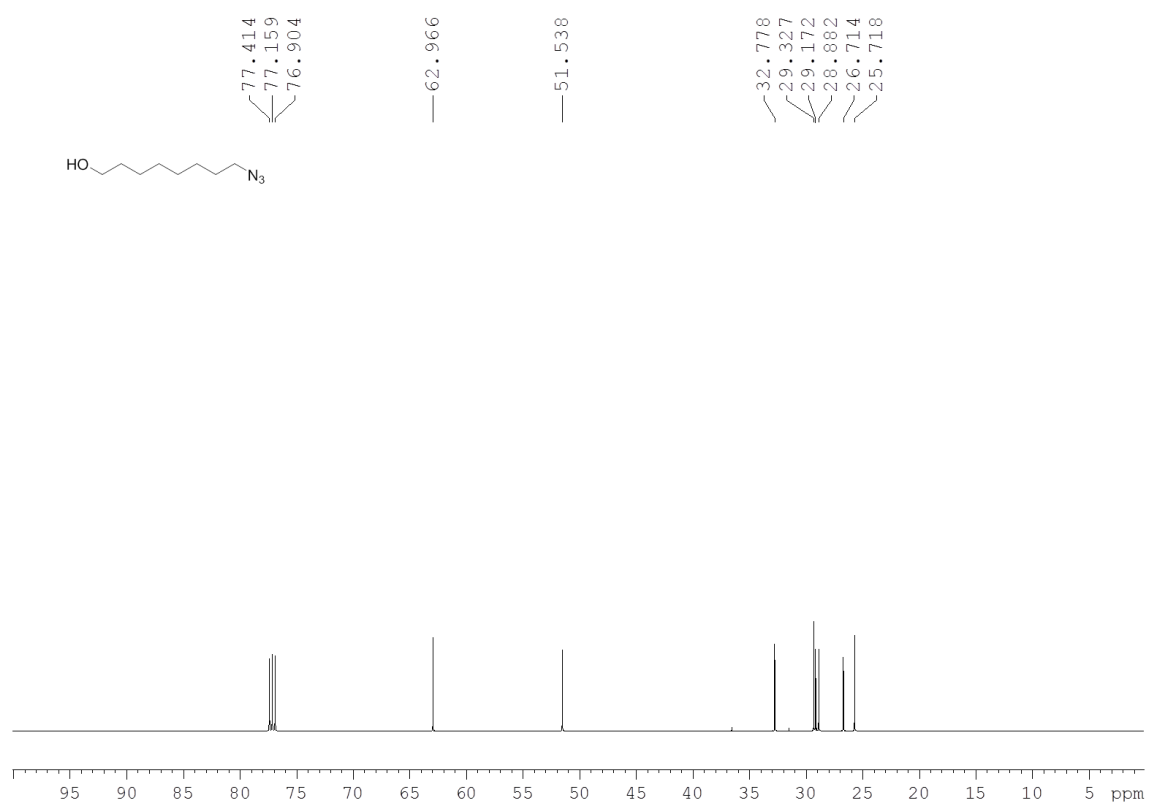

Figure S2. <sup>13</sup>C-NMR (500 MHz, CDCl<sub>3</sub>) of 8-Azidoctan-1-ol (**2**)

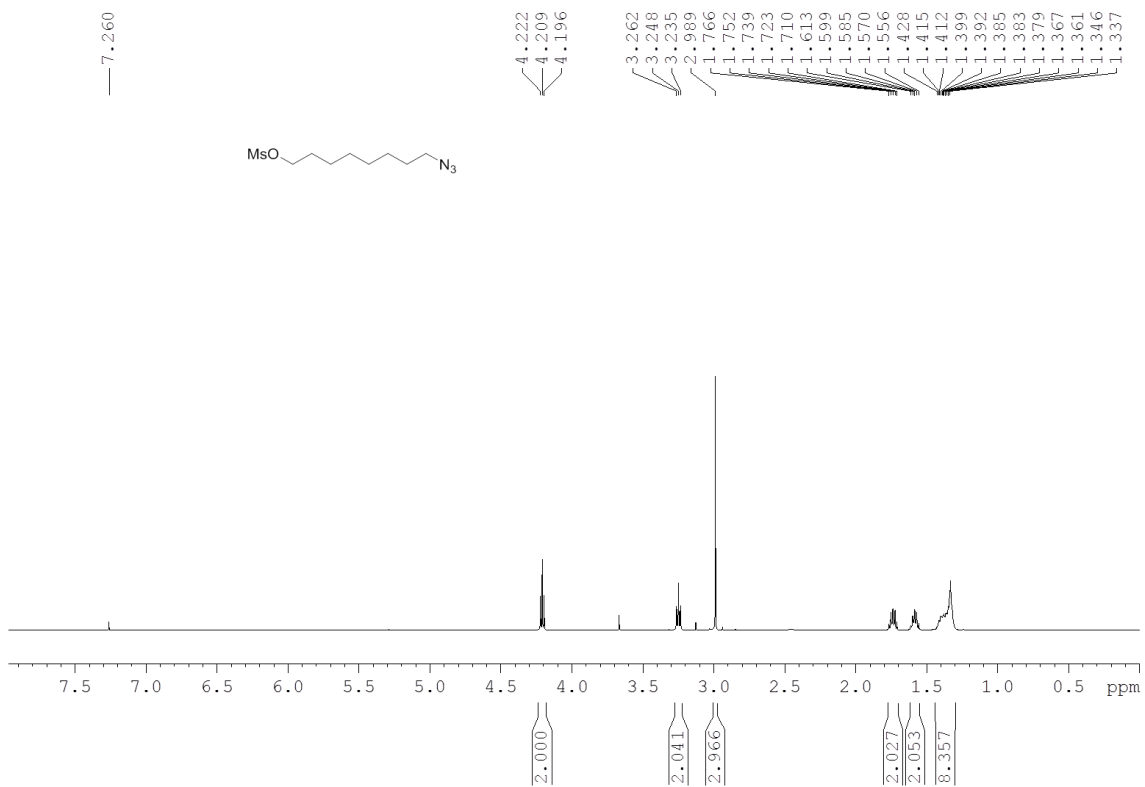

**Figure S3.**  $^1\text{H-NMR}$  (500 MHz,  $\text{CDCl}_3$ ) of 8-Azidoctyl methanesulfonate (**3**)

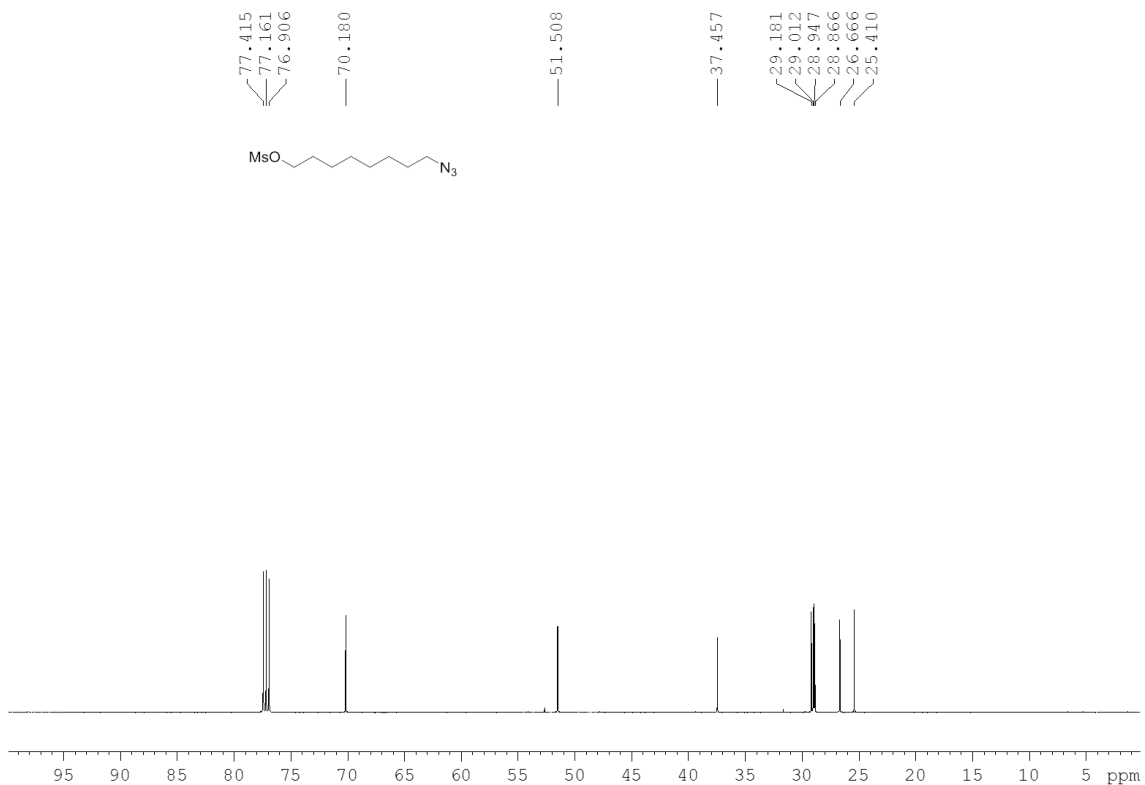

**Figure S4.**  $^{13}\text{C-NMR}$  (500 MHz,  $\text{CDCl}_3$ ) of 8-Azidoctyl methanesulfonate (**3**)

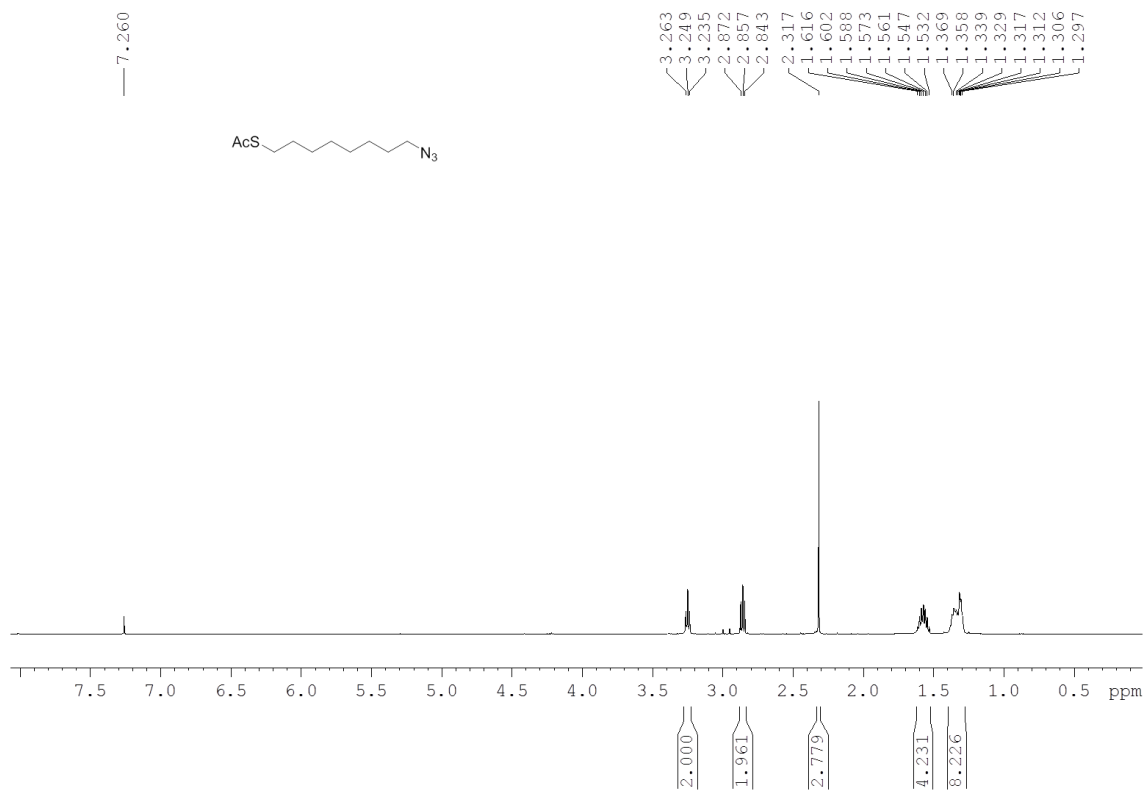

**Figure S5.**  $^1\text{H-NMR}$  (500 MHz,  $\text{CDCl}_3$ ) of 8-Azido-octyl-1-thioacetate (**4**)

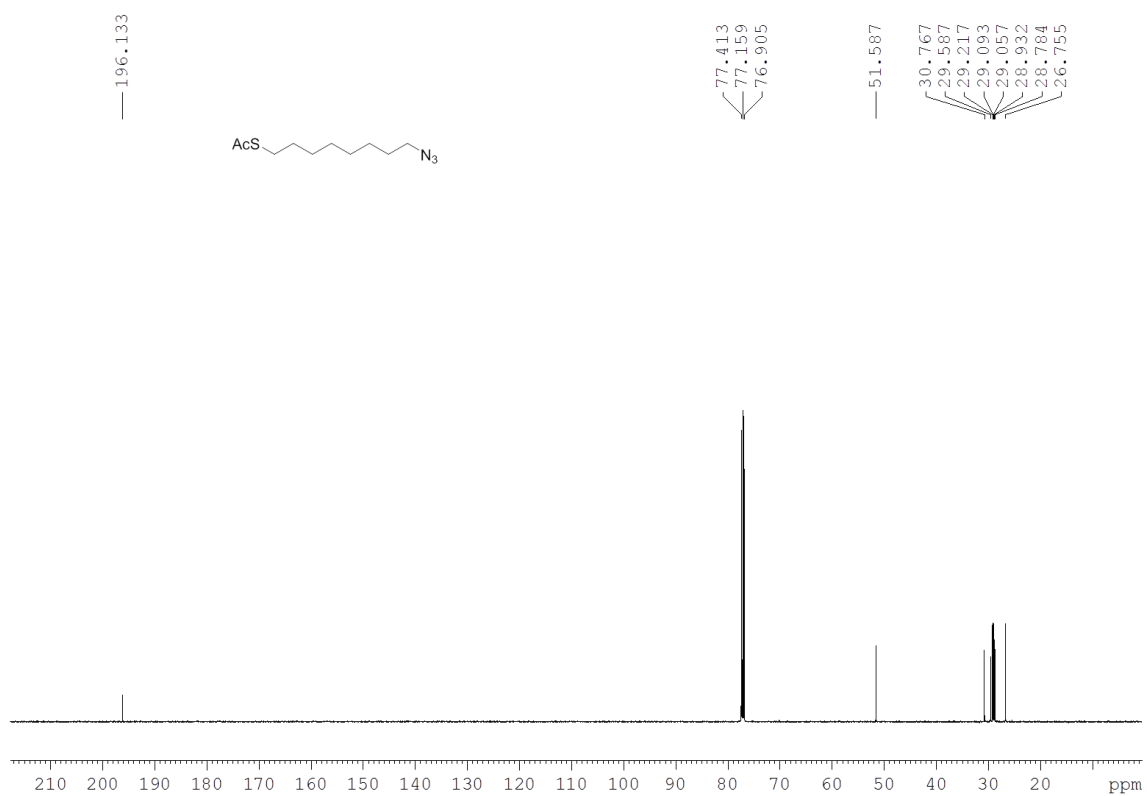

**Figure S6.**  $^{13}\text{C-NMR}$  (500 MHz,  $\text{CDCl}_3$ ) of 8-Azido-octyl-1-thioacetate (**4**)

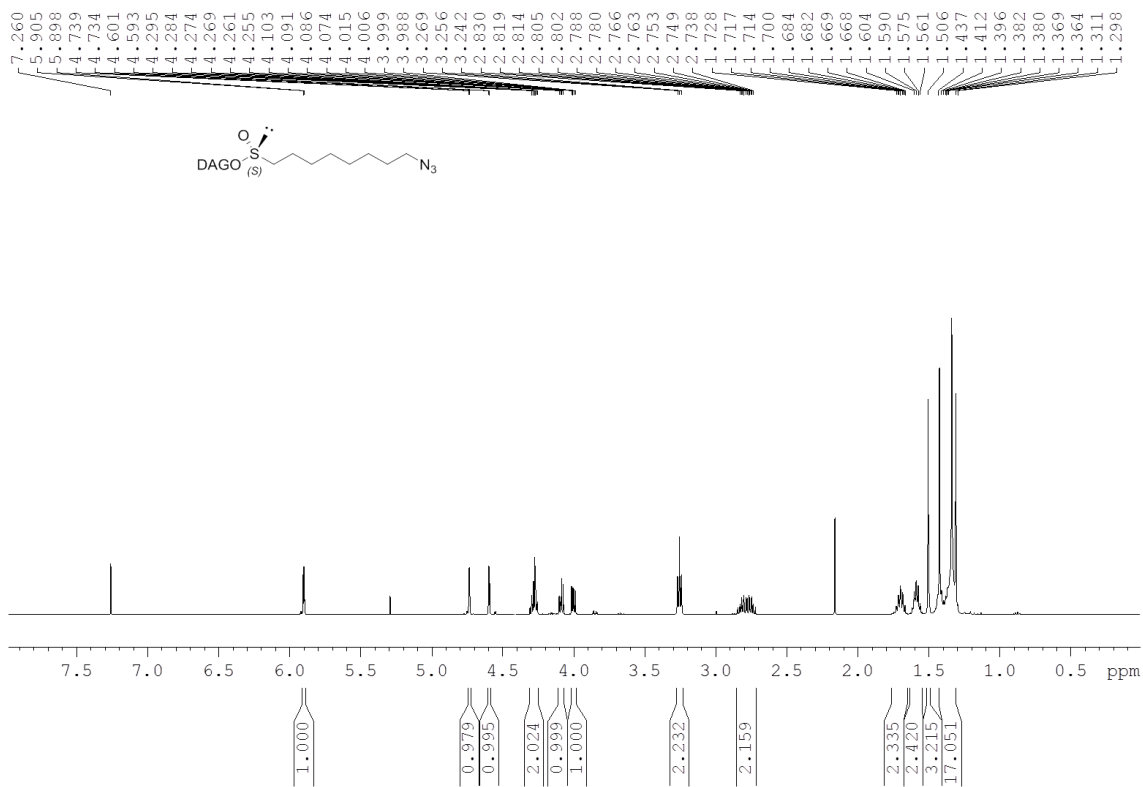

**Figure S7.** <sup>1</sup>H-NMR (500 MHz, CDCl<sub>3</sub>) of (*S*)-(1,2:5,6-Di-*O*-isopropylidene- $\alpha$ -d-glucofuranosyl) 8-azido-octanesulfinate (**6-(S<sub>5</sub>)**)

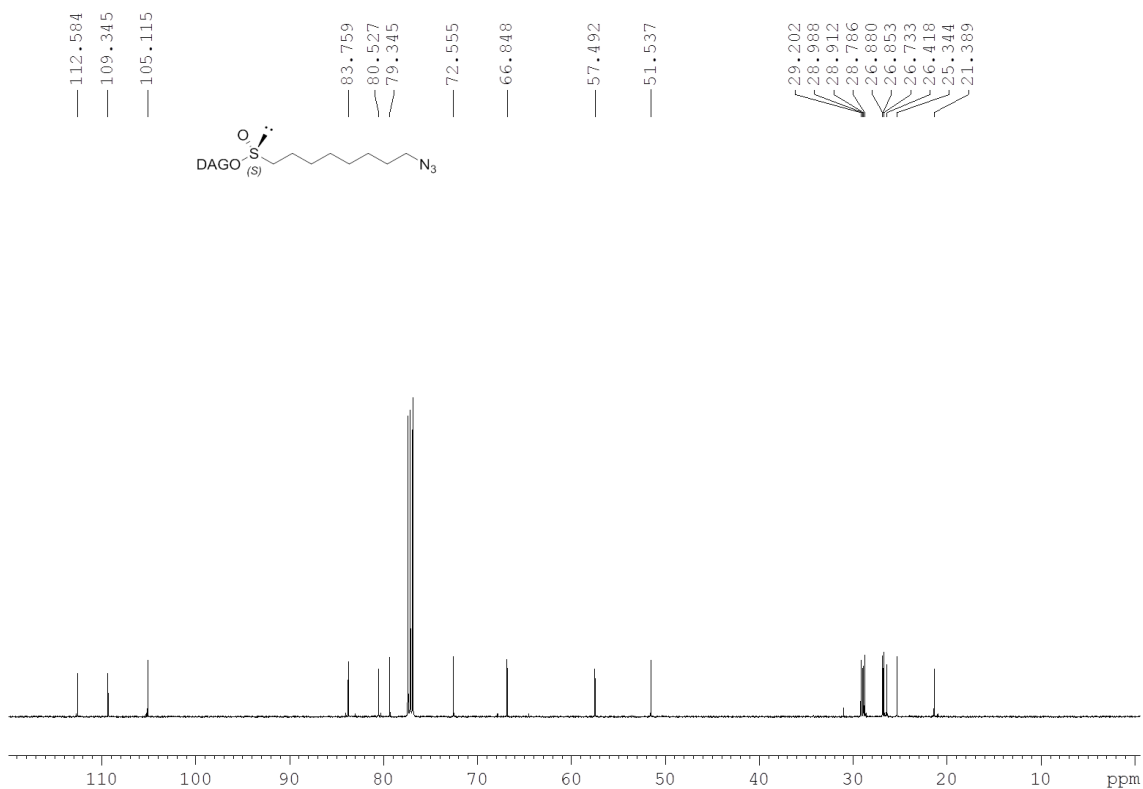

**Figure S8.** <sup>13</sup>C-NMR (500 MHz, CDCl<sub>3</sub>) of (*S*)-(1,2:5,6-Di-*O*-isopropylidene- $\alpha$ -d-glucofuranosyl) 8-azido-octanesulfinate (**6-(S<sub>5</sub>)**)

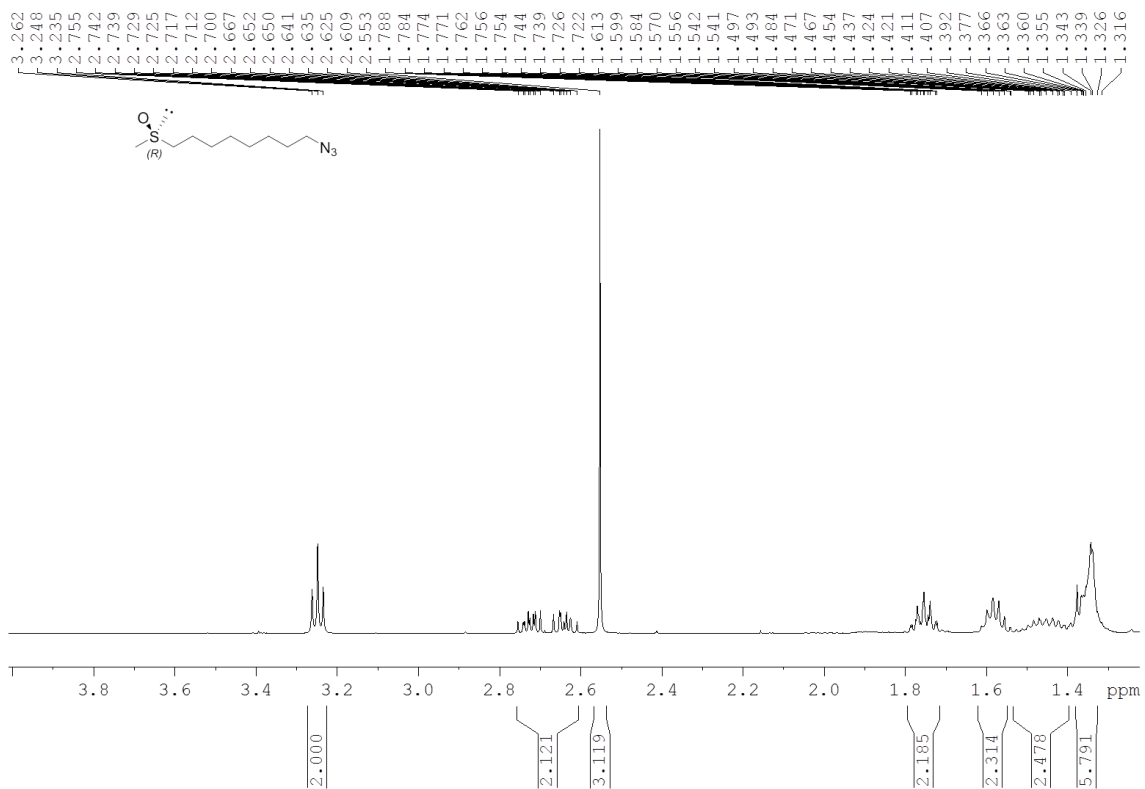

Figure S9.  $^1\text{H-NMR}$  (500 MHz,  $\text{CDCl}_3$ ) of (R)-(-)-1-Azido-8-(methylsulfinyl)octane (6-R)

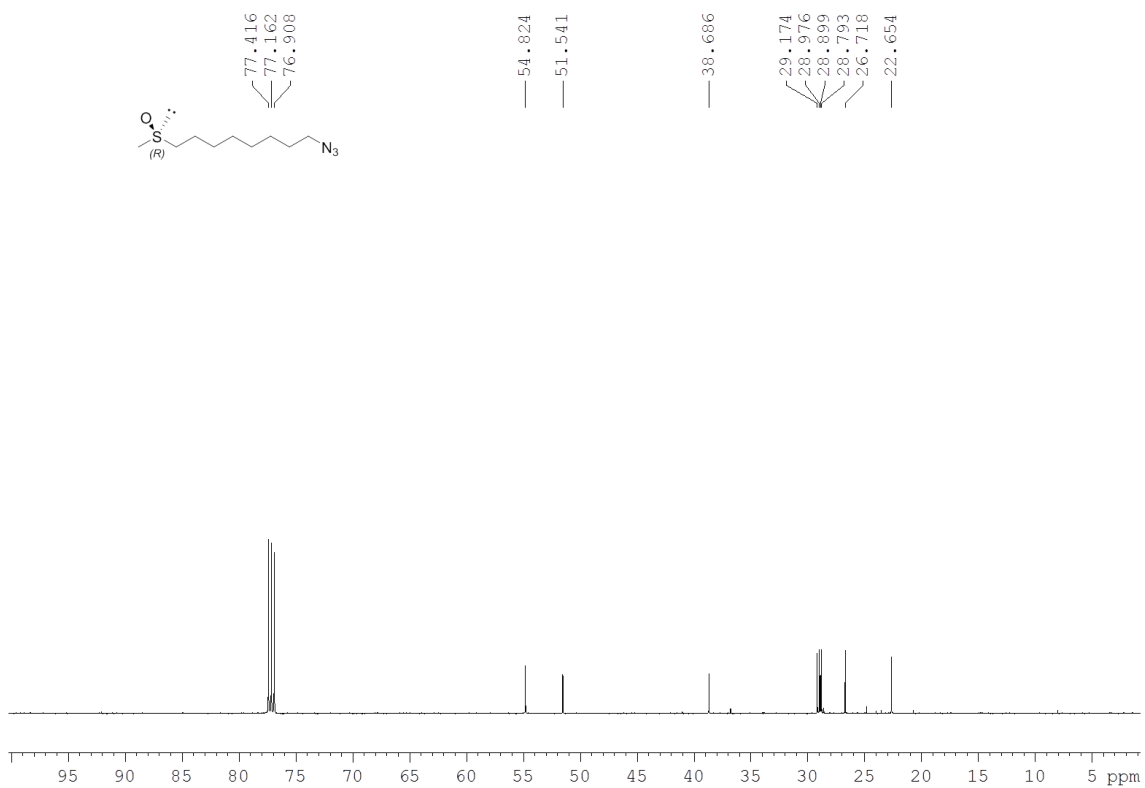

Figure S10.  $^{13}\text{C-NMR}$  (500 MHz,  $\text{CDCl}_3$ ) of (R)-(-)-1-Azido-8-(methylsulfinyl)octane (6-R)

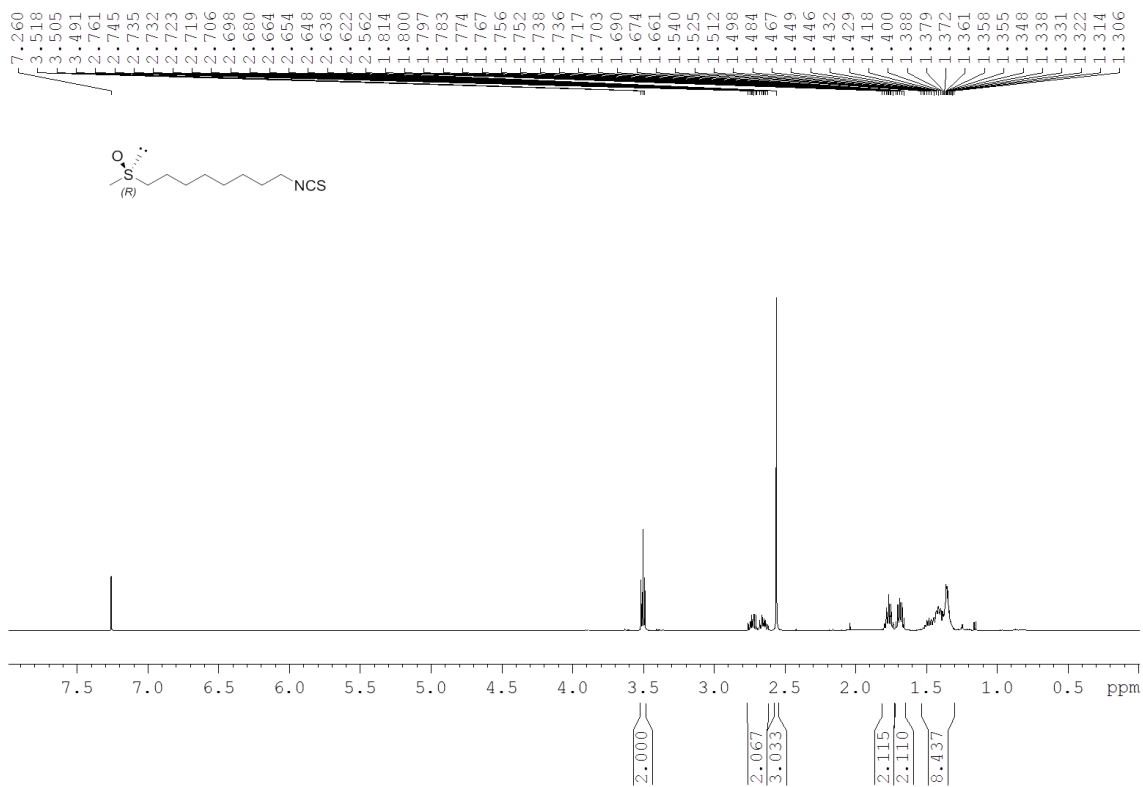

**Figure S11.** <sup>1</sup>H-NMR (500 MHz, CDCl<sub>3</sub>) of *(R)*-(-)-1-Isothiocyanato-8-(methylsulfinyl)octane (*(R)*-8-OITC)

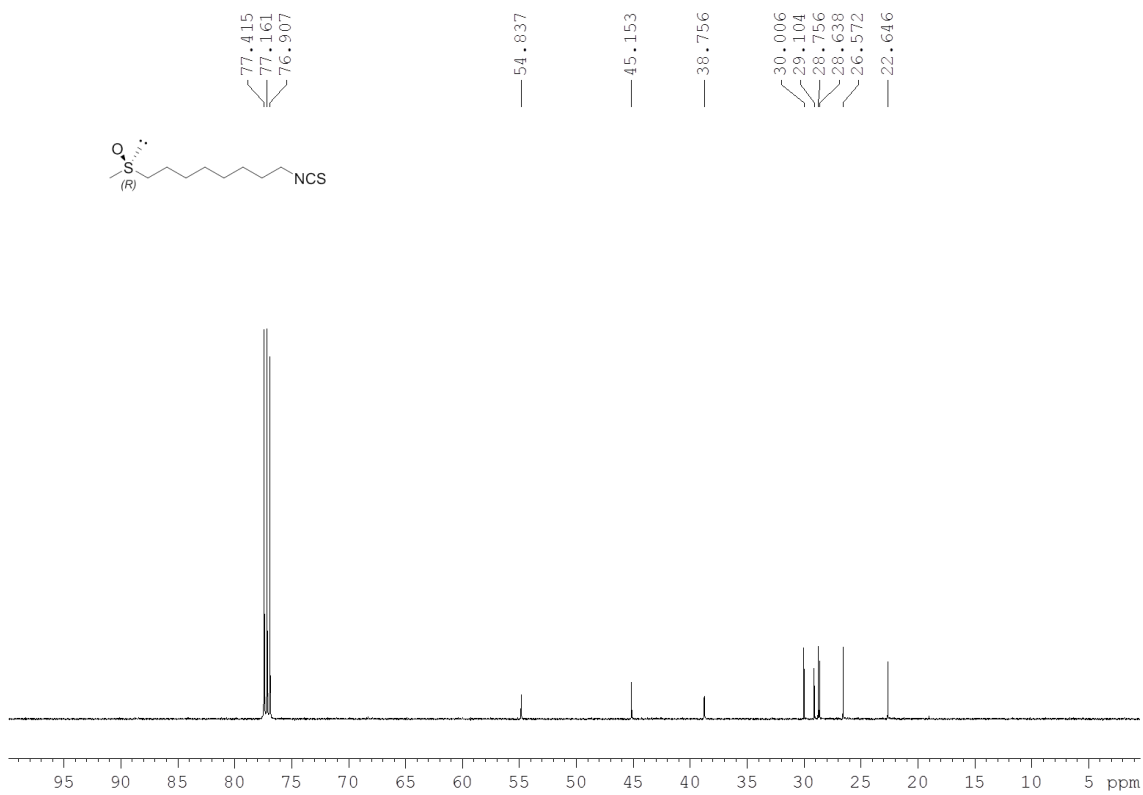

**Figure S12.** <sup>13</sup>C-NMR (500 MHz, CDCl<sub>3</sub>) of *(R)*-(-)-1-Isothiocyanato-8-(methylsulfinyl)octane (*(R)*-8-OITC)

**(rac)-8-OITC**

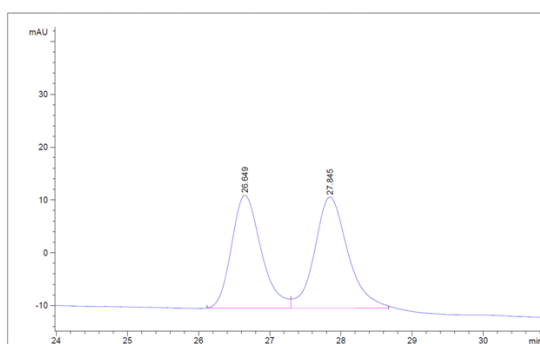

| Peak # | RetTime [min] | Type | Width [min] | Area [mAU*s] | Height [mAU] | Area %  |
|--------|---------------|------|-------------|--------------|--------------|---------|
| 1      | 26.649        | BV   | 0.4415      | 618.08533    | 21.36637     | 47.6274 |
| 2      | 27.845        | VB   | 0.4830      | 679.66620    | 21.03182     | 52.3726 |

**(R)-8-OITC**

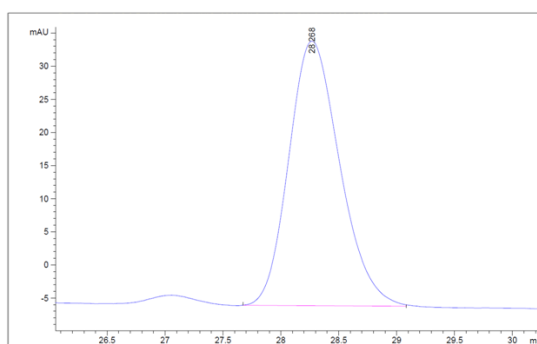

| Peak # | RetTime [min] | Type | Width [min] | Area [mAU*s] | Height [mAU] | Area %   |
|--------|---------------|------|-------------|--------------|--------------|----------|
| 1      | 28.269        | BB   | 0.4699      | 588.19452    | 19.27943     | 100.0000 |

**Figure S13.** HPLC chromatogram of the racemic form of 8-OITC and its enantiopure form **(R)-8-OITC**
